# Supplementary material for: Identification of Null Alleles and Deletions from SNP Genotypes for an Intercross Between Domestic and Wild Chickens
Source: PubMed Central journal article supplement (PMC3737165; doi:10.1534/g3.113.006643), 2013-08-01
Supplement: supp_g3.113.006643_006643SI.pdf [file supp_g3.113.006643_006643SI.pdf]

## Identification of null alleles and deletions from SNP genotypes for an intercross between domestic and wild chickens

Lucy Crooks<sup>\*1</sup>, Örjan Carlborg<sup>§</sup>, Stefan Marklund<sup>§</sup>, Anna M Johansson<sup>†</sup>

<sup>\*</sup> Department of Cell and Molecular Biology, Uppsala University, Uppsala, SE-75124, Sweden

<sup>§</sup> Department of Clinical Sciences, Swedish University of Agricultural Sciences, Uppsala, SE-756 51, Sweden

<sup>†</sup> Department of Animal Breeding and Genetics, Swedish University of Agricultural Sciences, Uppsala, SE-75007, Sweden

<sup>1</sup> Present address: Wellcome Trust Sanger Institute, Hinxton, Cambridge, CB10 1HH, United Kingdom

**DOI: 10.1534/g3.113.006643**

## File S1

### Data Files

File S1 is available for download at <http://www.g3journal.org/lookup/suppl/doi:10.1534/g3.113.006643/-/DC1>.

#### ### pedigree.txt

File with one line per sample  
Individuals grouped in families  
First row for each family gives number of F<sub>2</sub> individuals in family  
Second to fifth rows give data on grandparents  
Sixth and seventh rows, data on parents  
Remaining rows, data on F<sub>2</sub> individuals  
Columns are id, sire id, dam id, sex and line (for founders)  
Sex is recorded as 1 for males and 2 for females  
Line is recorded as 1 for Red Junglefowl and 2 for White Leghorn

#### ### genotypes.txt

Data from the 10K SNPs  
Header with SNP names  
Ids in first column, genotypes in subsequent columns  
One line per sample  
Genotypes coded as 11, 12, 22; missing genotypes are represented by 00

#### ### intensity\_data\_region\_x.txt

Data from the 60K SNPs in regions identified by 10K SNPs  
Columns are SNP name, sample id, X raw intensity and Y raw intensity  
For region 2, five SNPs in the interval determined from 10K SNPs are given  
For regions 3 and 4, the SNP in the interval determined from 10K SNPs and the two flanking SNPs are given  
There were no SNPs in the interval determined from 10K SNPs for region 1

#### ###first\_marker\_per\_chromosome.txt

File with the first marker on each chromosome, i.e. marker number 1 is the first marker on chromosome 1, marker number 1927 is the first marker on chromosome 2, marker number 3032 is the first marker on chromosome 3 and so on.
